# Supplementary material
Source: MDPI journal article supplement (https://www.mdpi.com/2079-6412/14/4/443)
Supplement: s1 [file s1 › coatings-2940583-supplementary.pdf]

# Supplementary Materials: Realizing Dual Functions by Y<sub>2</sub>O<sub>3</sub> Modification to Enhance the Electrochemical Performance of LiNi<sub>0.8</sub>Co<sub>0.1</sub>Mn<sub>0.1</sub>O<sub>2</sub> Material

Xintao Wang, Feng Wang \*, Meiqi Zheng, Maohua Rong, Jiang Wang \*, Jianqiu Deng, Peng Liu and Daosheng Liu

School of Materials Science and Engineering & Guangxi Key Laboratory of Information Materials, Guilin University of Electronic Technology, Guilin 541004, China; jqdeng@guet.edu.cn (J.D.)

\* Correspondence: wf@guet.edu.cn (F.W.); waj124@guet.edu.cn (J.W.)

**Citation:** Wang, X.; Wang, F.; Zheng, M.; Rong, M.; Wang, J.; Deng, J.; Liu, P.; Liu, D. Realizing Dual Functions through Y<sub>2</sub>O<sub>3</sub> Modification to Enhance the Electrochemical Performance of LiNi<sub>0.8</sub>Co<sub>0.1</sub>Mn<sub>0.1</sub>O<sub>2</sub> Material. *Coatings* **2024**, *14*, 443. <https://doi.org/10.3390/coatings14040443>

Academic Editors: Gergana Alexieva, Rositsa Gergova and Tsvetanka Babeva

Received: 14 March 2024

Revised: 3 April 2024

Accepted: 4 April 2024

Published: 8 April 2024

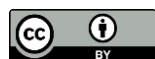

**Copyright:** © 2024 by the authors. Licensee MDPI, Basel, Switzerland. This article is an open access article distributed under the terms and conditions of the Creative Commons Attribution (CC BY) license (<https://creativecommons.org/licenses/by/4.0/>).

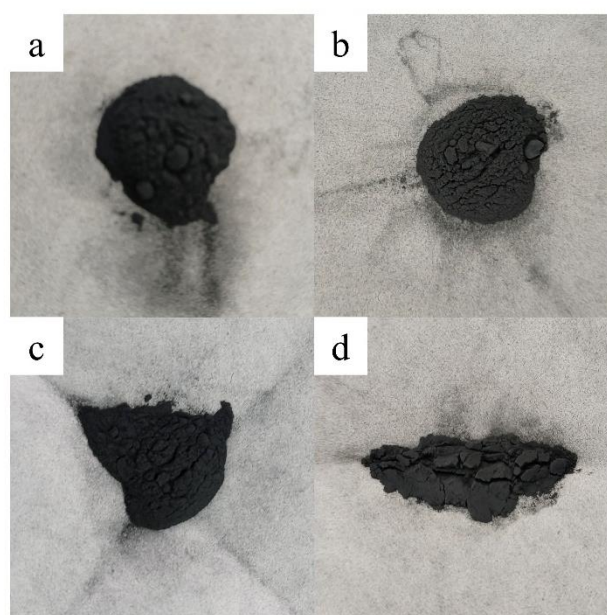

**Figure S1.** The positive electrode materials used in the experiment were pure NCM811 and Y<sub>2</sub>O<sub>3</sub>-modified NCM811 samples, (a) bare NCM811, (b) NCM@YO400, (c) NCM@YO700, (d) NCM@YO750.

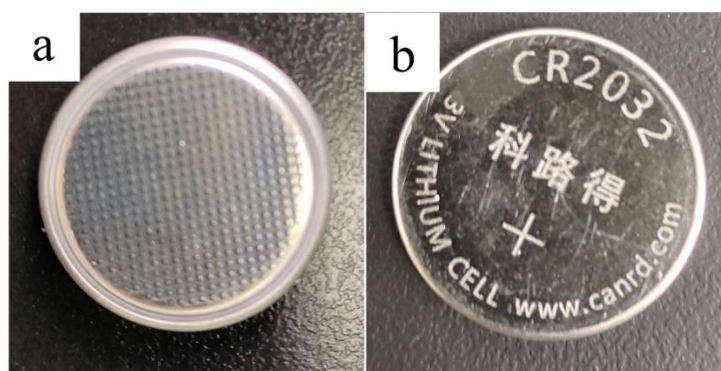

**Figure S2.** Pictures of CR2032 button half-coin batteries in this experiment.
